# Supplementary material for: Structural variation of the 3-acetamido-4,5,6-trihydroxyazepane iminosugar through epimerization and C-alkylation leads to low micromolar HexAB and NagZ inhibitors
Source: Royal Society of Chemistry journal article supplement (doi:10.1039/d1ob02280f), 2021-12-17

## Supporting Information

### Structural variation of the 3-acetamido-4,5,6-trihydroxyazepane iminosugar through epimerization and C-alkylation leads to low micromolar HexAB and NagZ inhibitors

J. Bouquet,<sup>a</sup> N. Auberger,<sup>a</sup> R. Ashmus,<sup>b</sup> D. King,<sup>b</sup> A. Bordes,<sup>a</sup> N. Fontelle,<sup>a</sup> S. Nakagawa,<sup>c</sup> Z. Madden,<sup>b</sup> C. Proceviat,<sup>b</sup> A. Kato,<sup>c\*</sup> J. Désiré,<sup>a\*</sup> D. J. Vocadlo,<sup>b\*</sup> and Y. Blériot<sup>a\*</sup>

- 
- [a] J. Bouquet, N. Auberger, N. Fontelle, A. Bordes, J. Désiré, Y. Blériot, IC2MP-UMR CNRS 7285, Université de Poitiers, Equipe "Synthèse Organique", Groupe Glycochimie, 4 rue Michel Brunet, 86073 Poitiers cedex 9, France
- [b] D. King, R. Ashmus, Z. Madden, C. Proceviat, D. J. Vocadlo, Department of Chemistry, Simon Fraser University, 8888 University Drive, Burnaby, British Columbia, Canada V5S 1P6
- [c] S. Nakagawa, A. Kato, Department of Hospital Pharmacy, University of Toyama, 2630 Sugitani, Toyama 930-0194, Japan

### Table of Contents

Copies of <sup>1</sup>H and <sup>13</sup>C NMR spectra

p. 2-19

$^1\text{H}$  NMR spectrum of **15**, 400 MHz,  $\text{CDCl}_3$

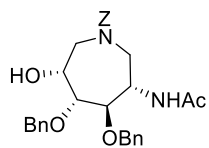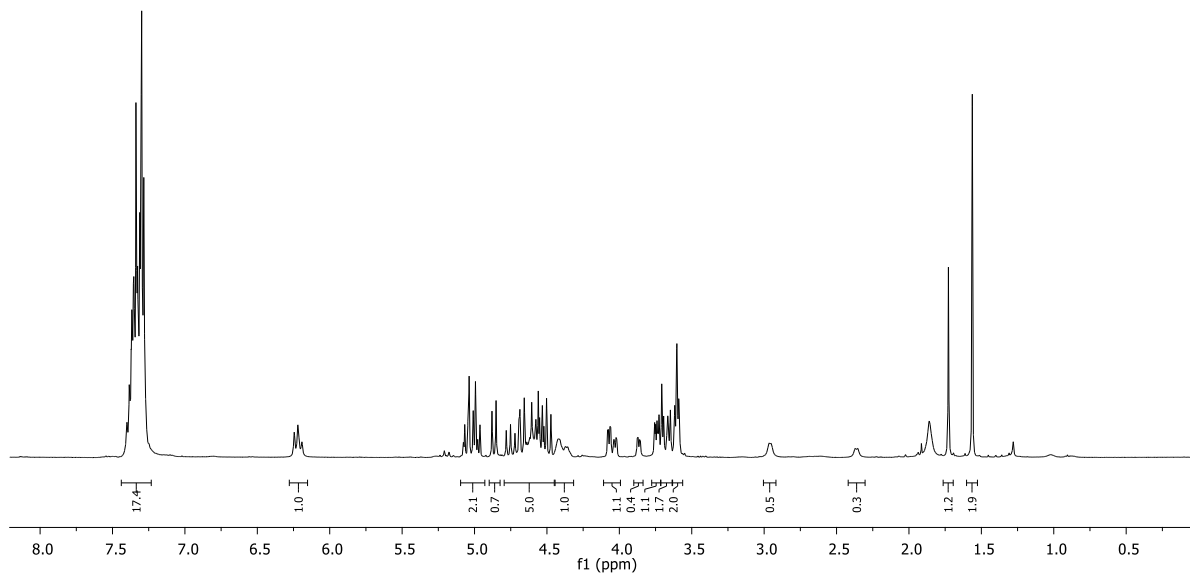

$^{13}\text{C}$  NMR spectrum of **15**, 100 MHz,  $\text{CDCl}_3$

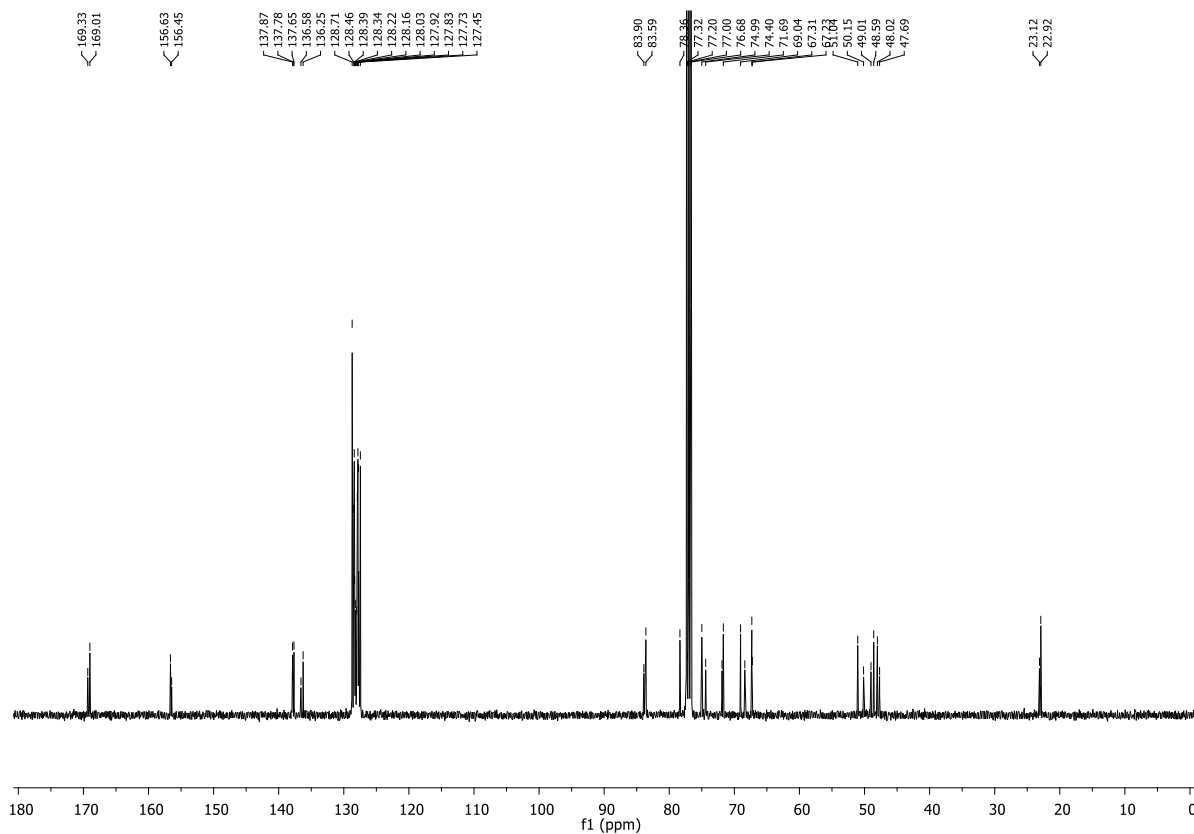

$^1\text{H}$  NMR spectrum of **16**, 400 MHz,  $\text{CDCl}_3$

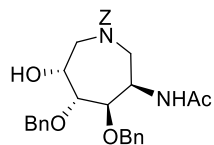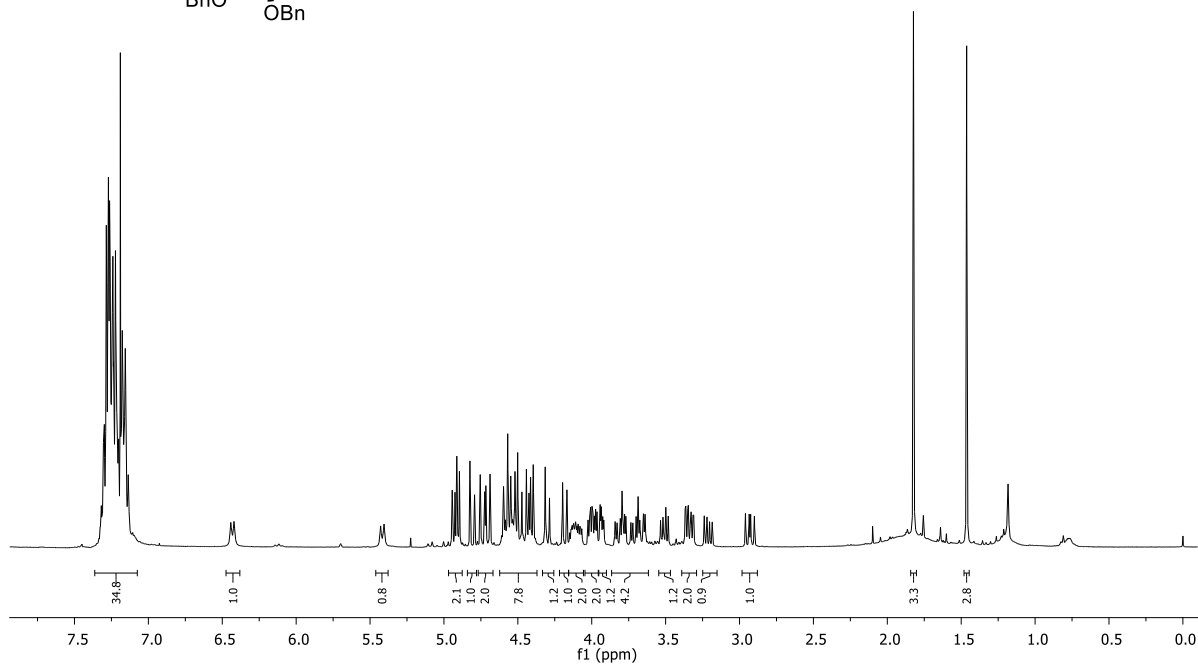

$^{13}\text{C}$  NMR spectrum of **16**, 100 MHz,  $\text{CDCl}_3$

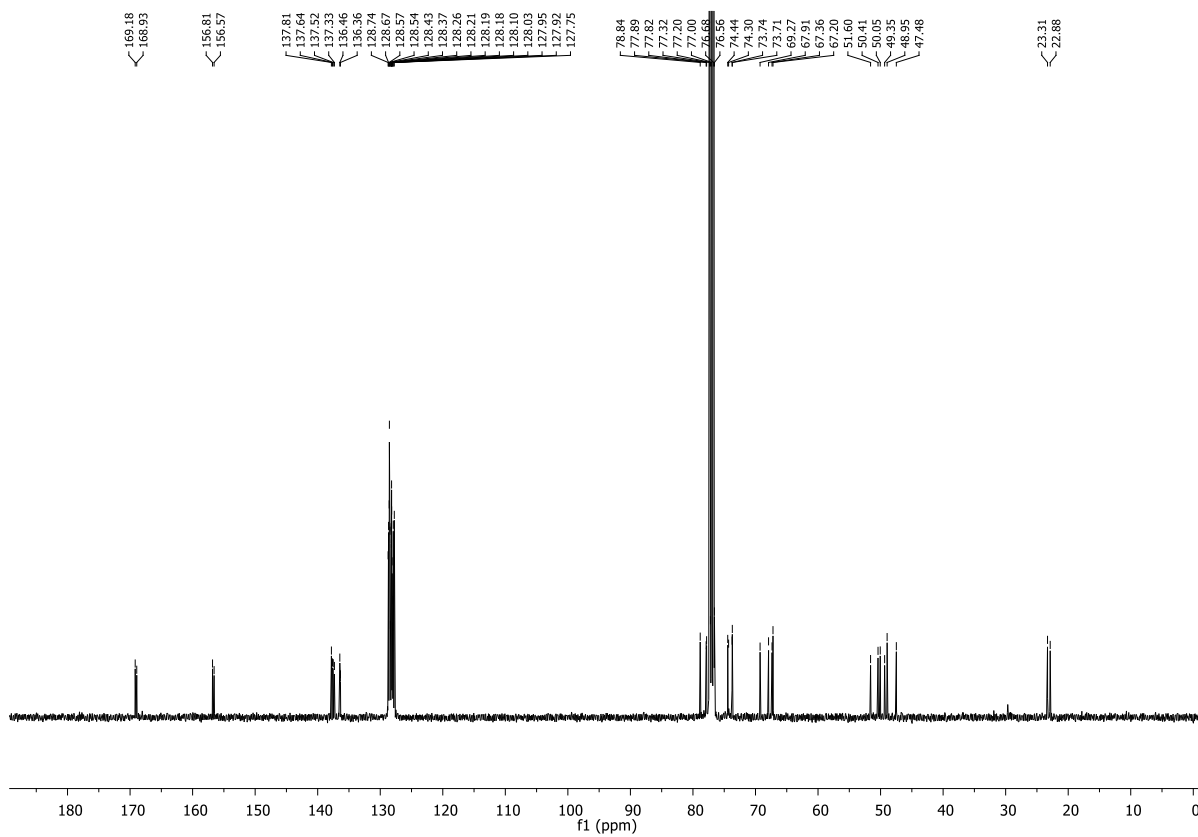

$^1\text{H}$  NMR spectrum of **18**, 400 MHz,  $\text{D}_2\text{O}$

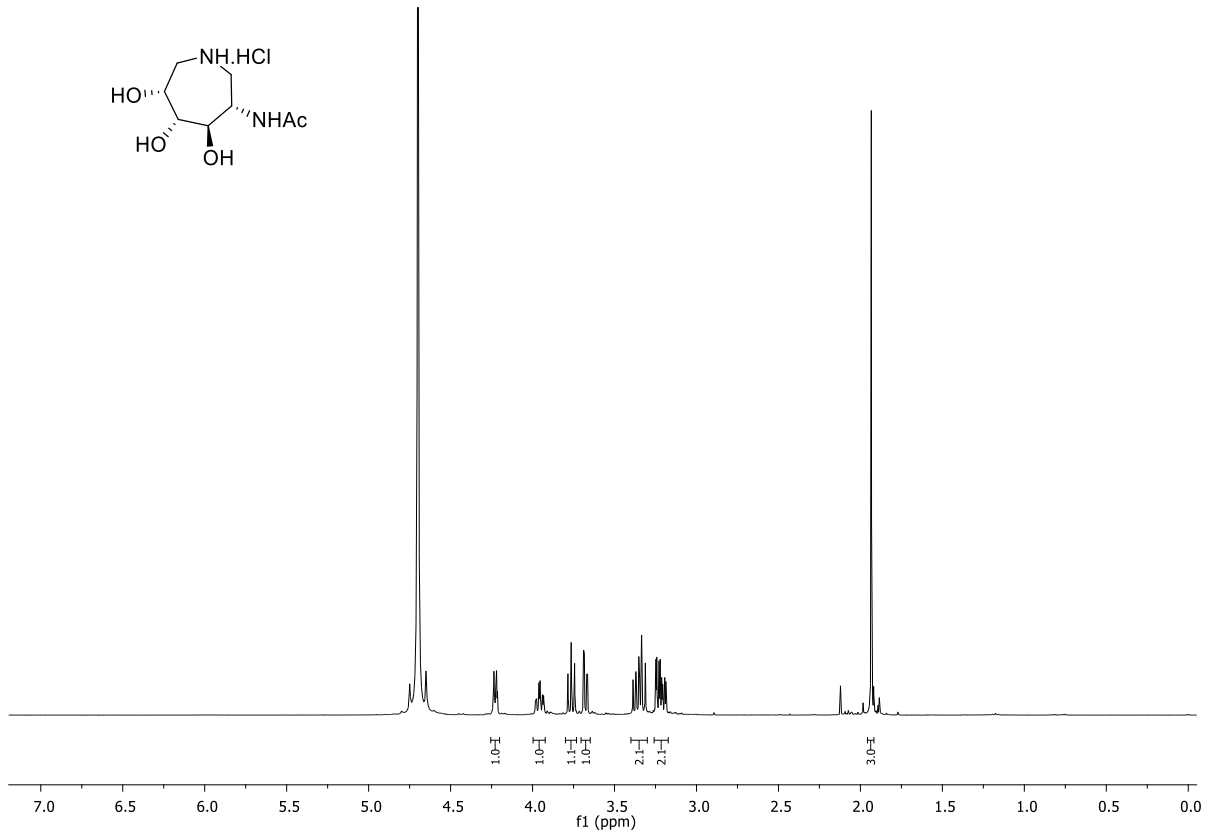

$^{13}\text{C}$  NMR spectrum of **18**, 100 MHz,  $\text{D}_2\text{O}$

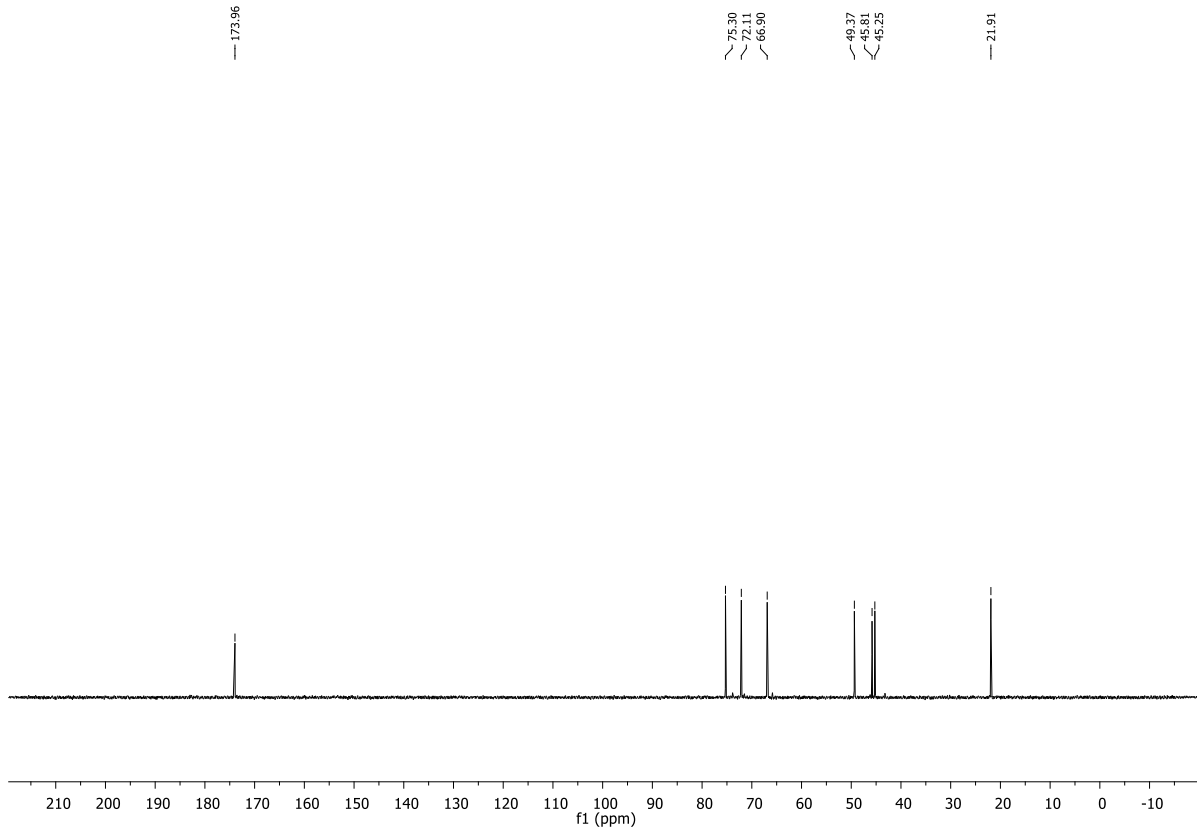

$^1\text{H}$  NMR spectrum of **19**, 400 MHz,  $\text{D}_2\text{O}$

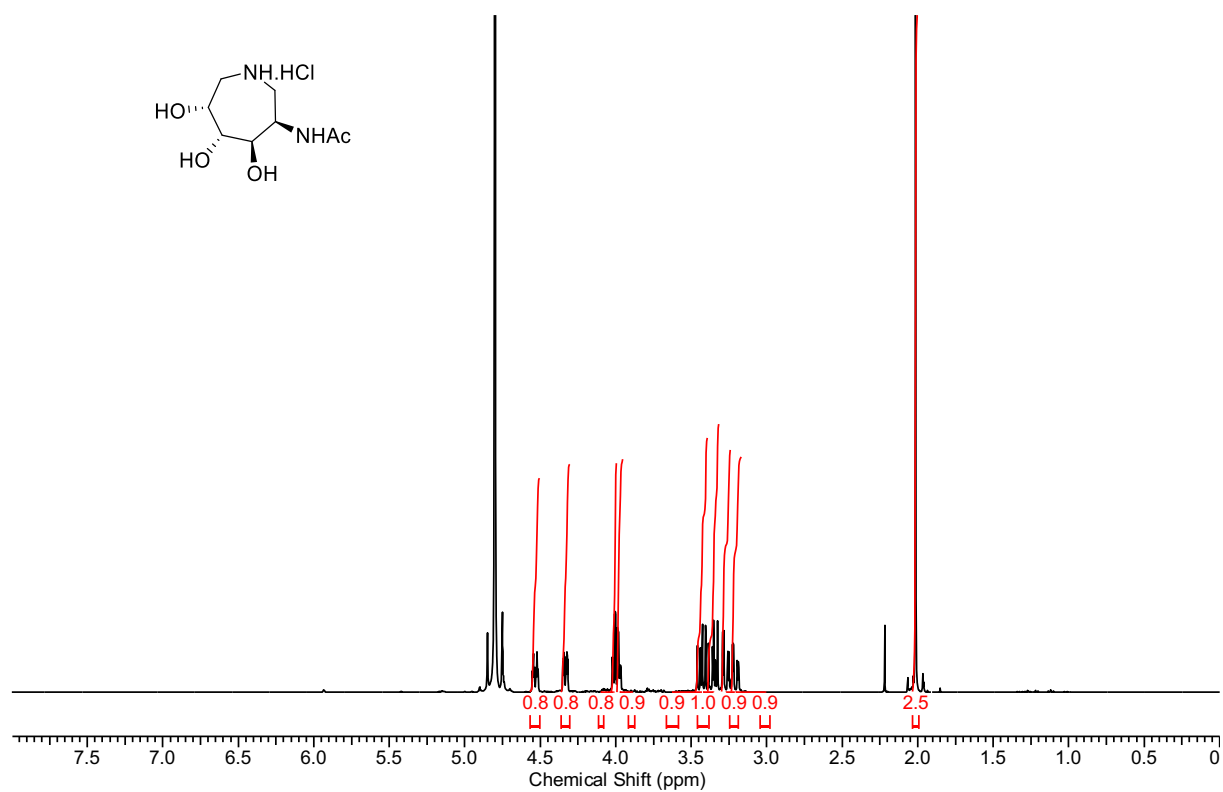

$^{13}\text{C}$  NMR spectrum of **19**, 100 MHz,  $\text{D}_2\text{O}$

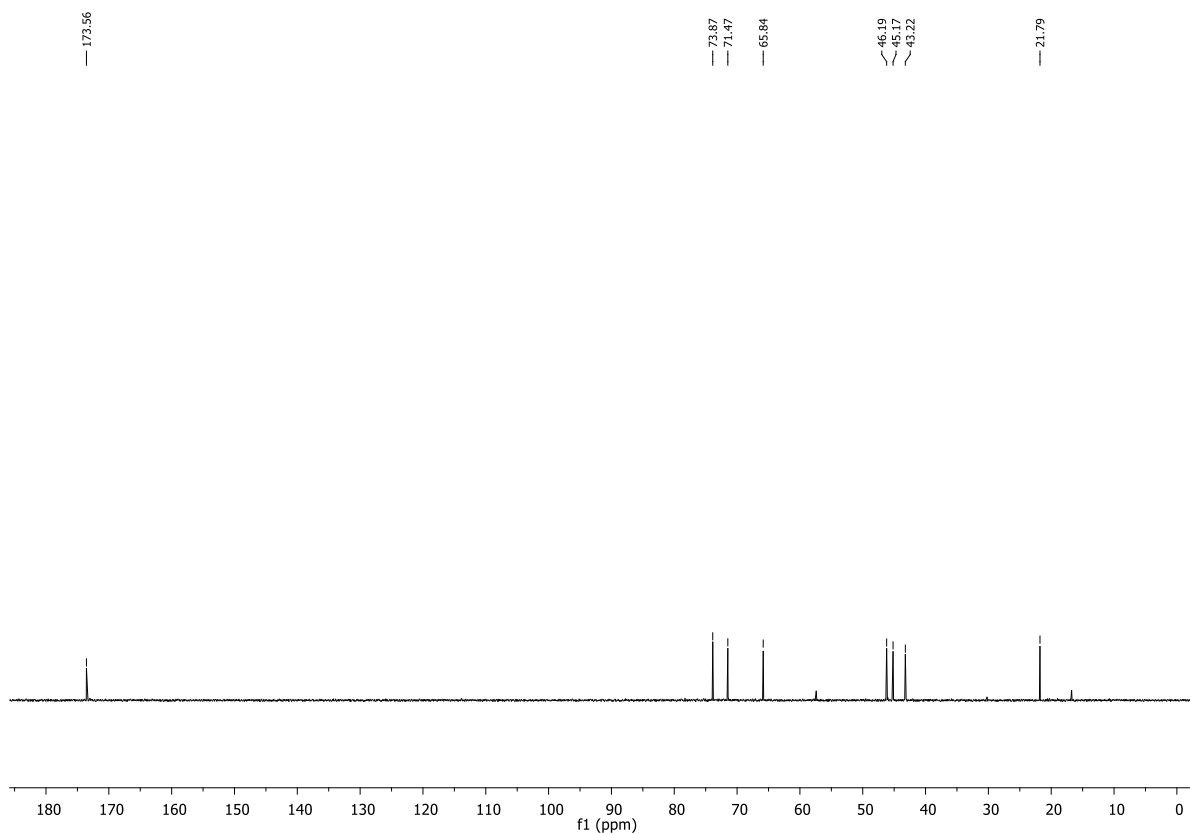

$^1\text{H}$  NMR spectrum of **20**, 400 MHz,  $\text{D}_2\text{O}$

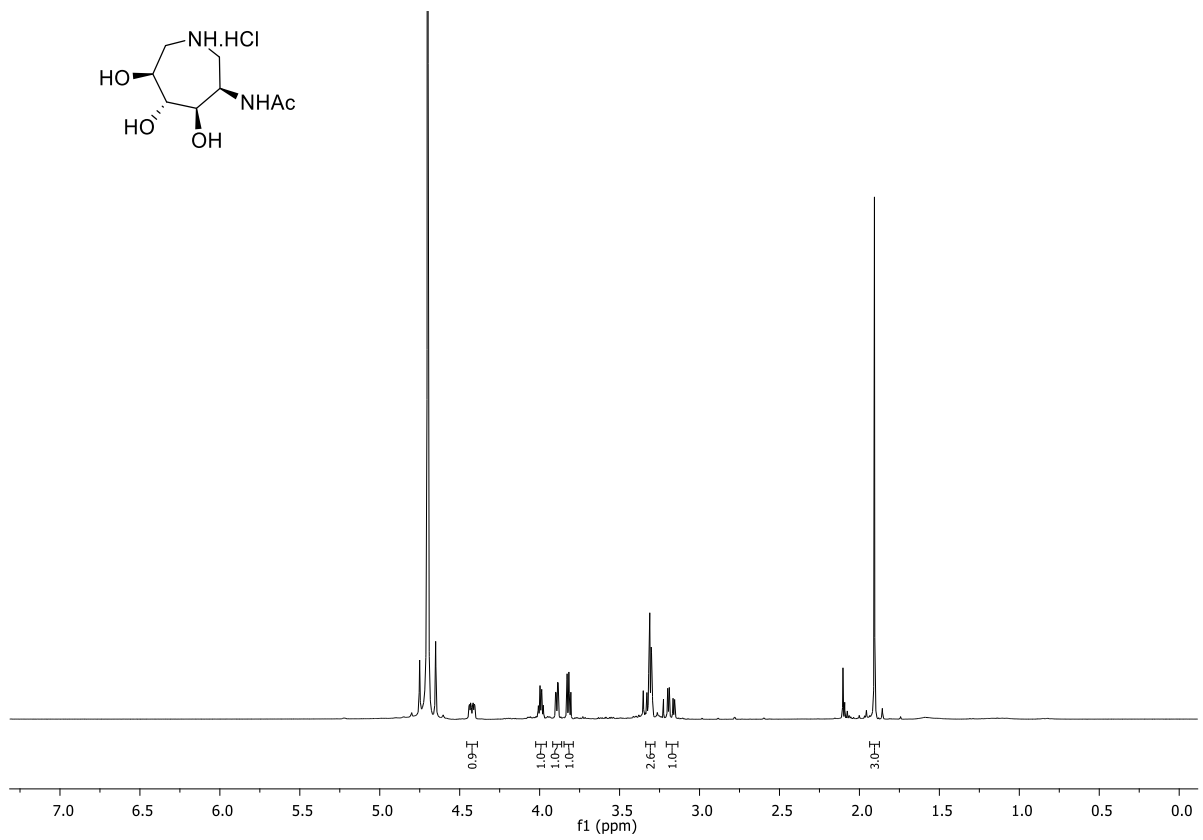

$^{13}\text{C}$  NMR spectrum of **20**, 100 MHz,  $\text{D}_2\text{O}$

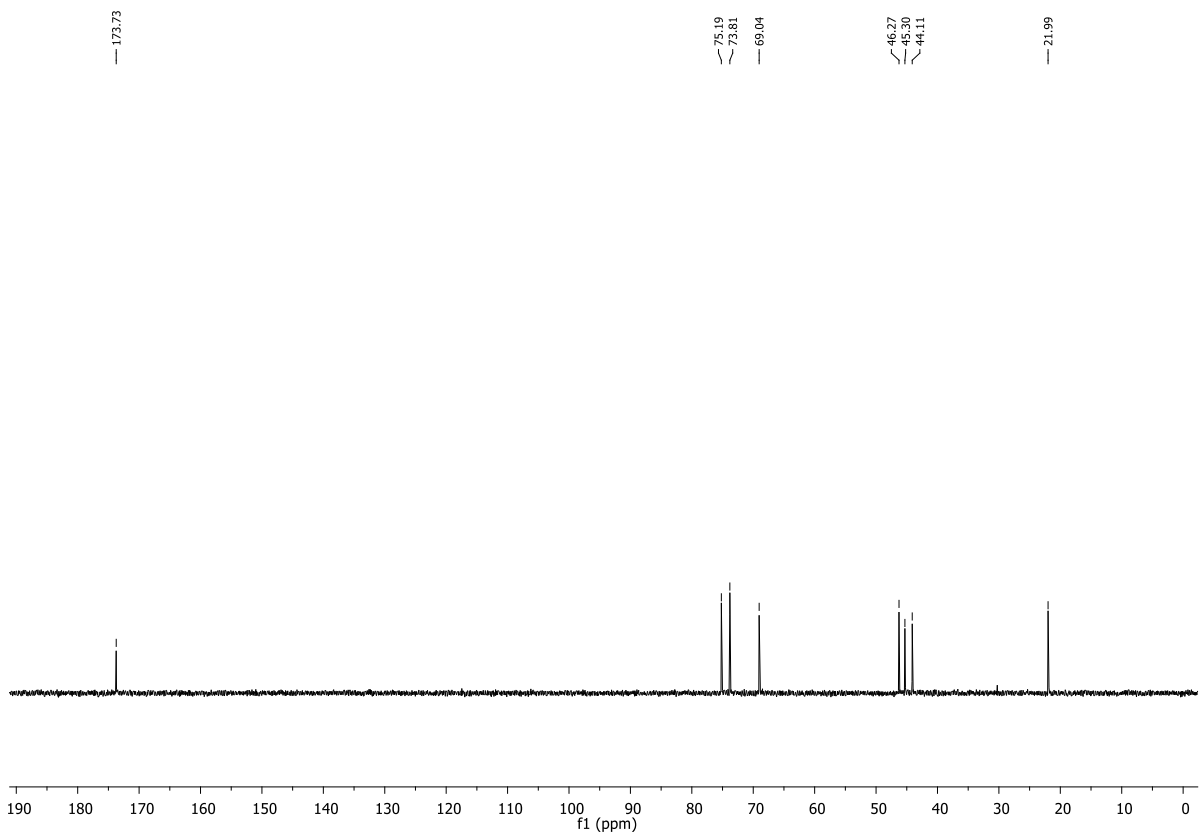

<sup>1</sup>H NMR spectrum of **22**, 500 MHz, CDCl<sub>3</sub>

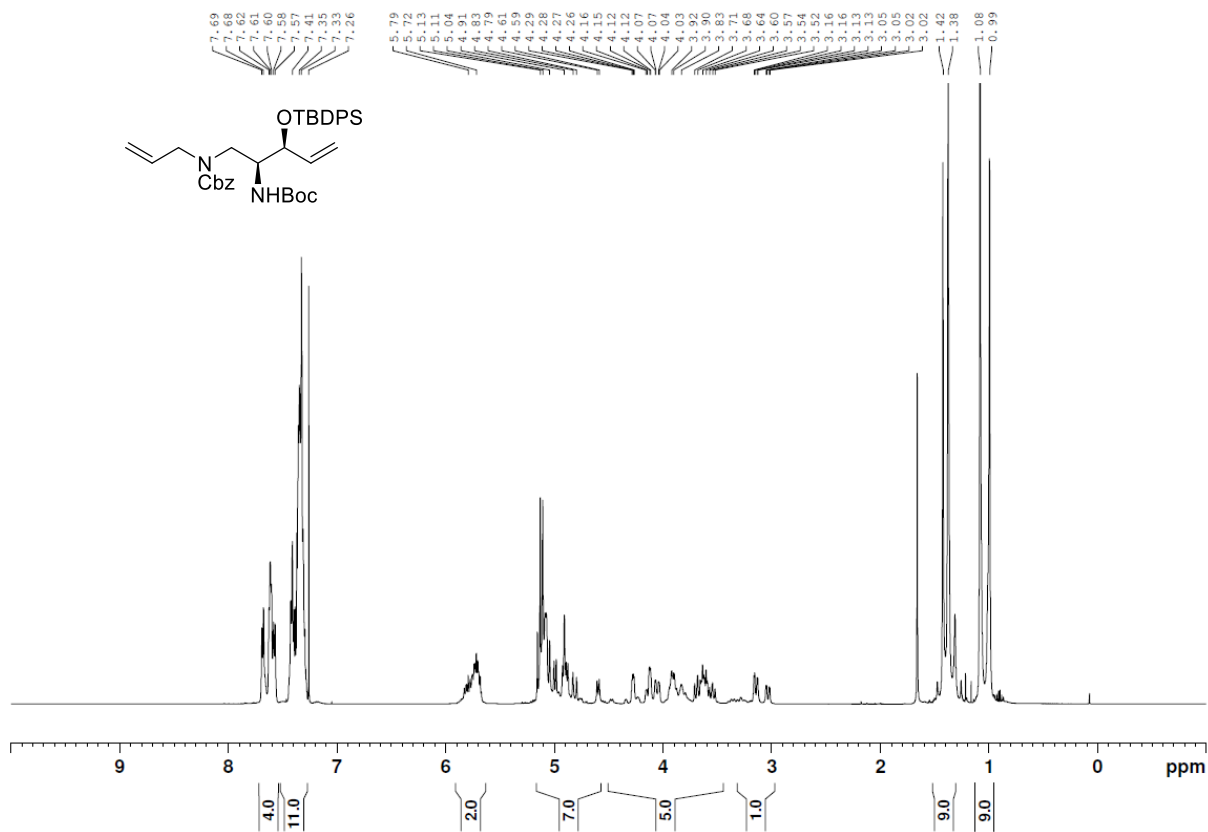

<sup>13</sup>C NMR spectrum of **22**, 125 MHz, CDCl<sub>3</sub>

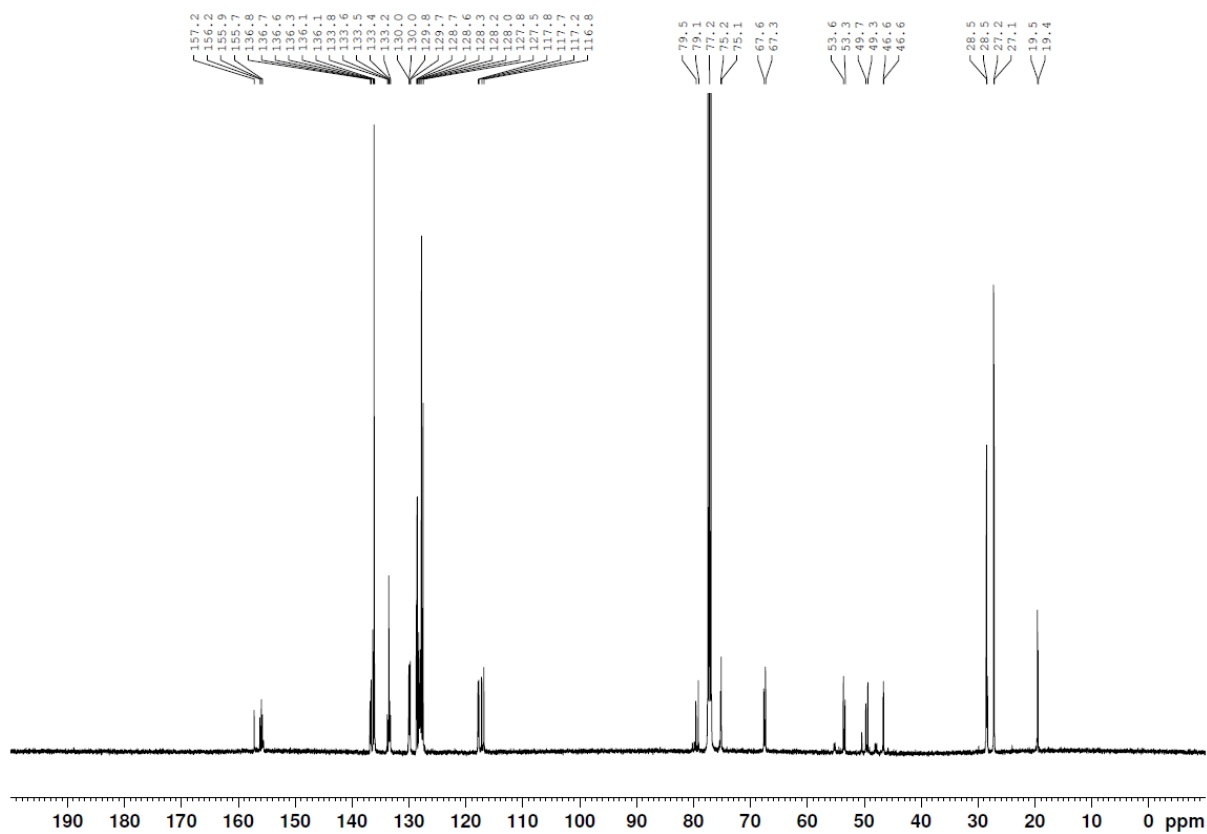

$^1\text{H}$  NMR spectrum of **23**, 500 MHz,  $\text{CDCl}_3$

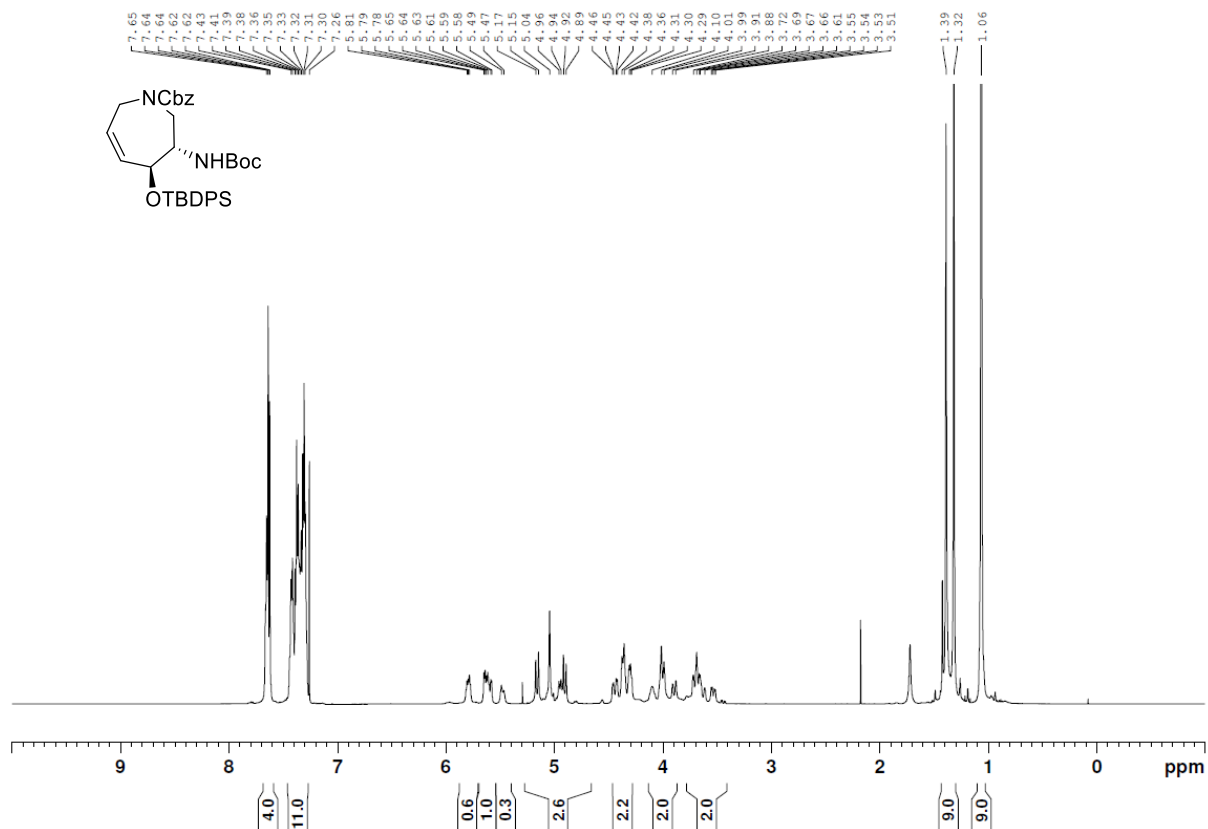

$^{13}\text{C}$  NMR spectrum of **23**, 125 MHz,  $\text{CDCl}_3$

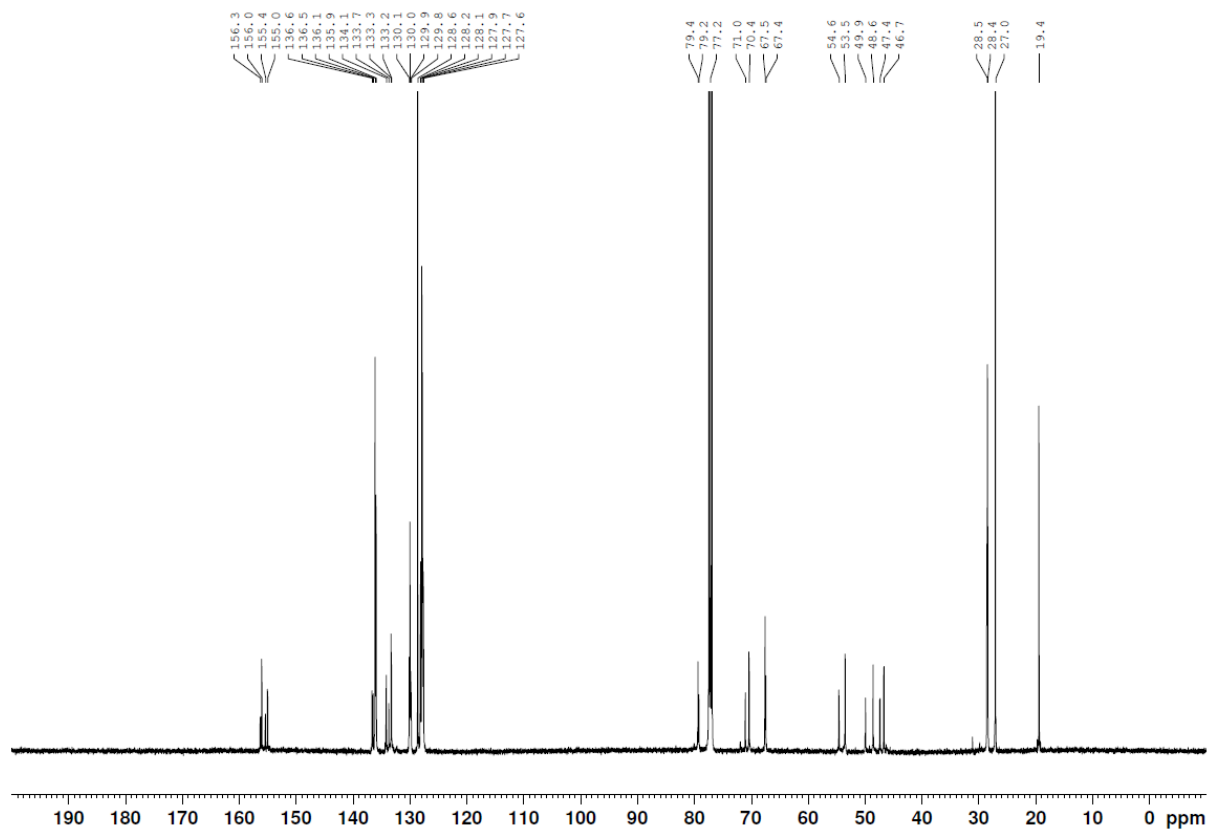



<sup>1</sup>H NMR spectrum of **24**, 400 MHz, CDCl<sub>3</sub>

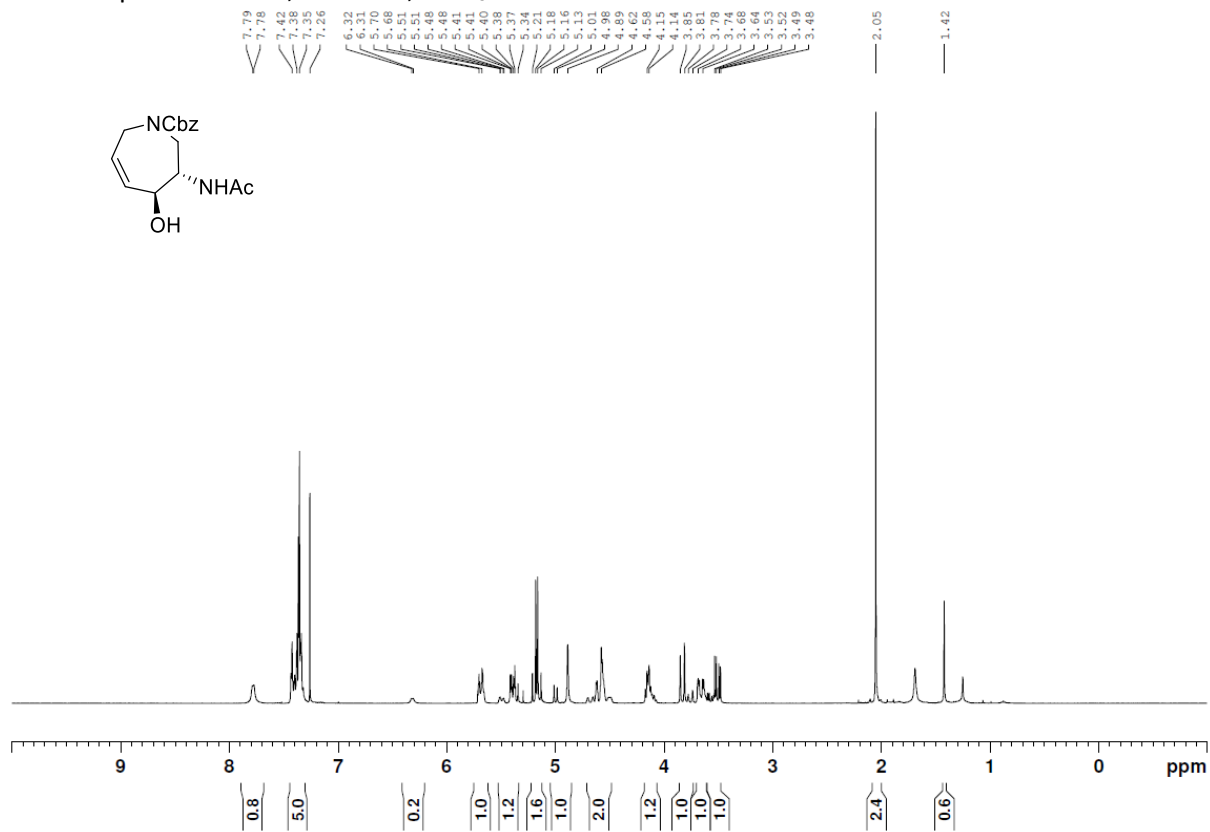

<sup>13</sup>C NMR spectrum of **24**, 100 MHz, CDCl<sub>3</sub>

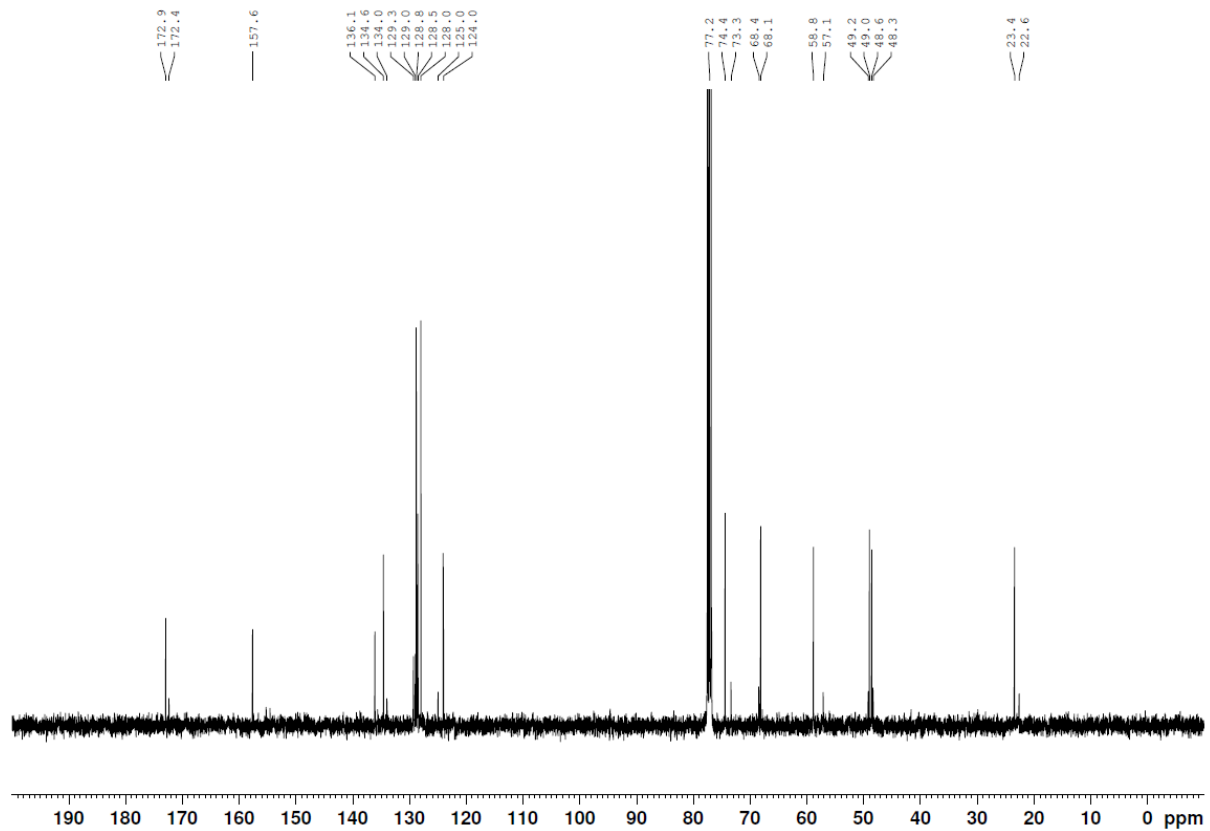



$^1\text{H}$  NMR spectrum of **26**, 500 MHz,  $\text{CDCl}_3$

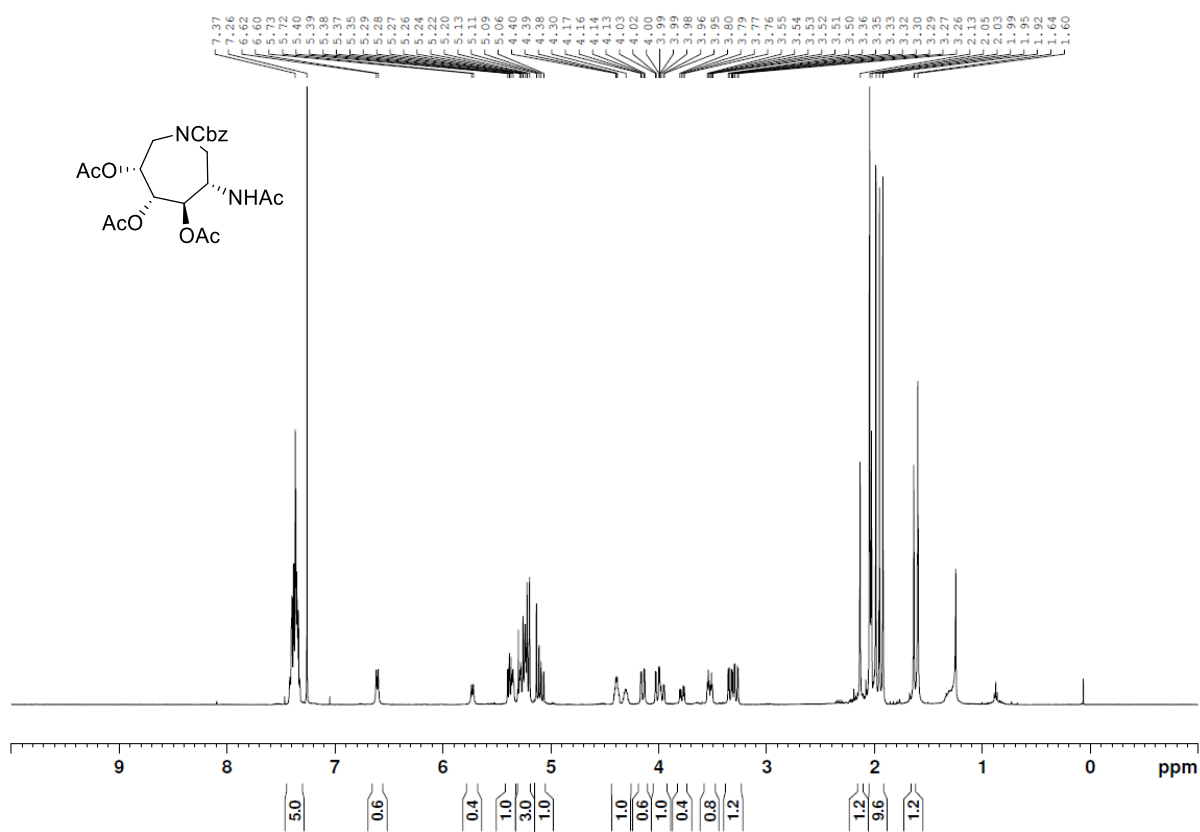

$^{13}\text{C}$  NMR spectrum of **26**, 125 MHz,  $\text{CDCl}_3$

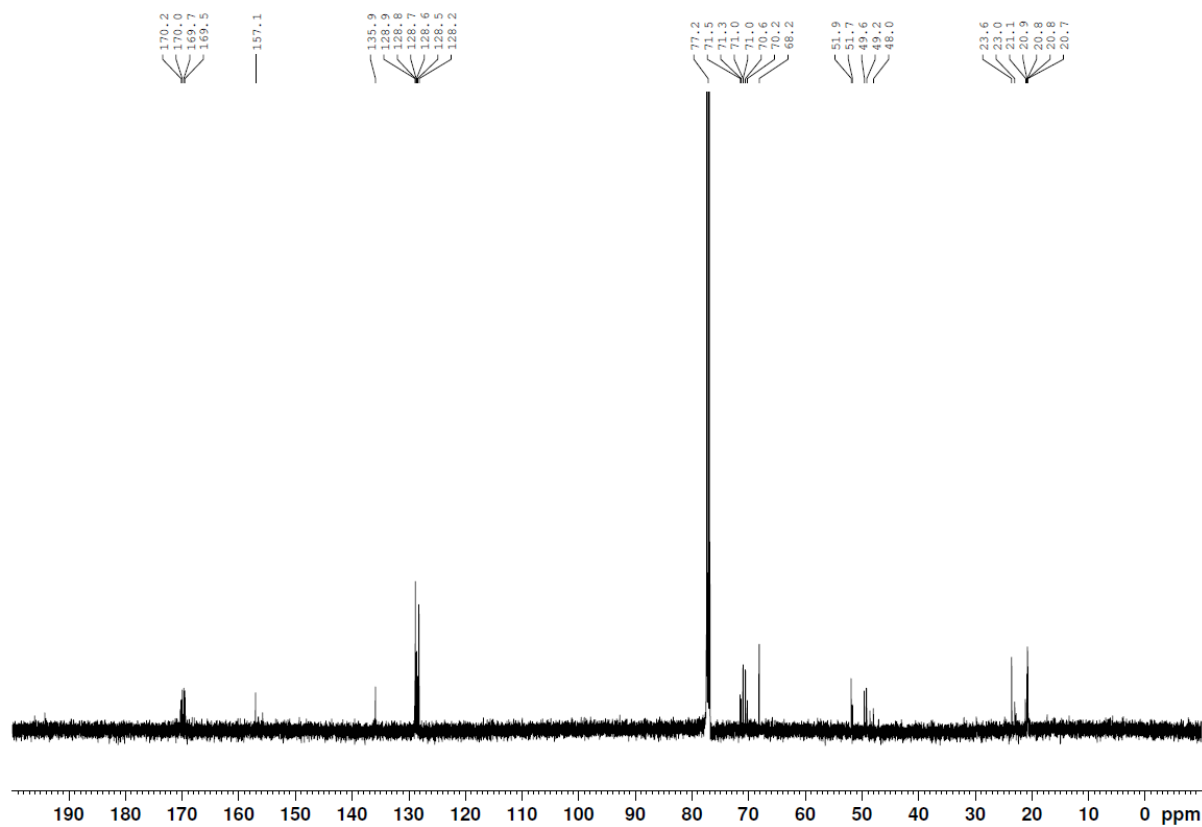

$^1\text{H}$  NMR spectrum of **27**, 500 MHz,  $\text{D}_2\text{O}$

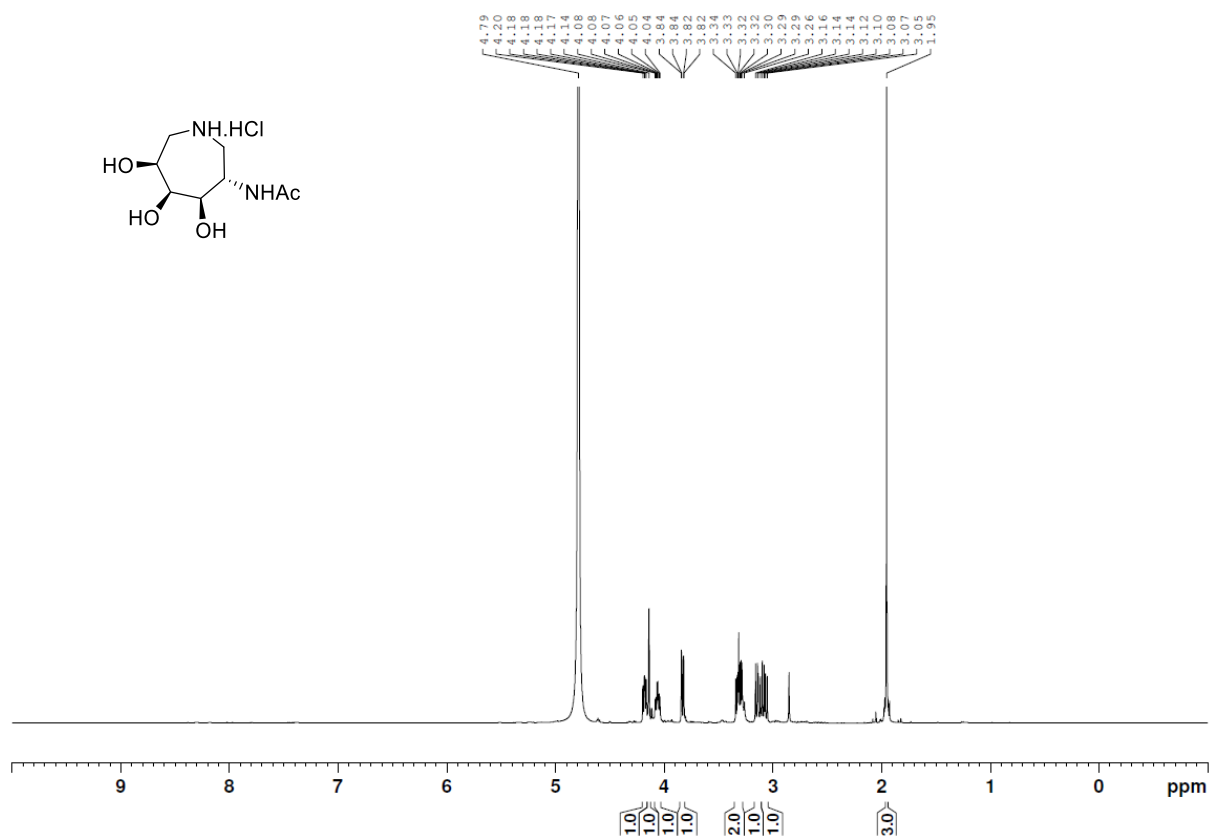

$^{13}\text{C}$  NMR spectrum of **27**, 125 MHz,  $\text{D}_2\text{O}$

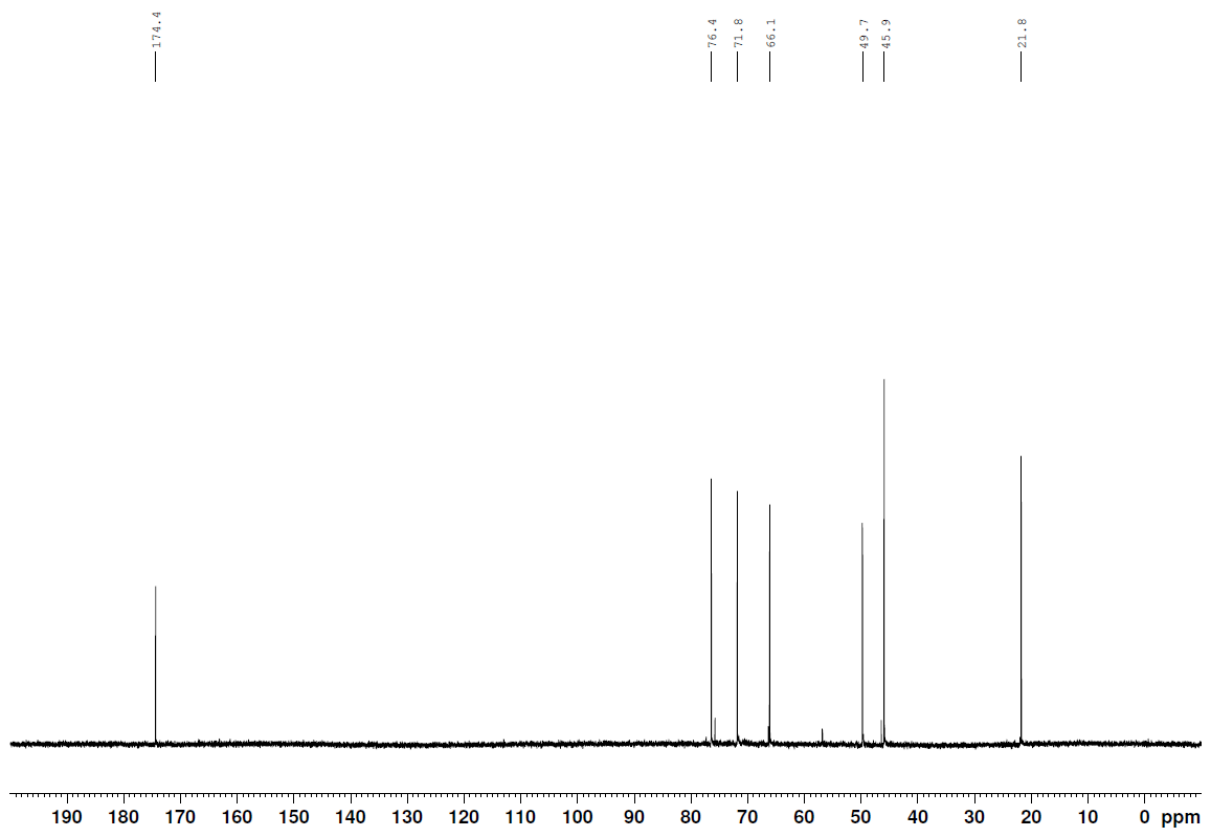

$^1\text{H}$  NMR spectrum of **31**, 400 MHz,  $\text{CD}_3\text{OD}$

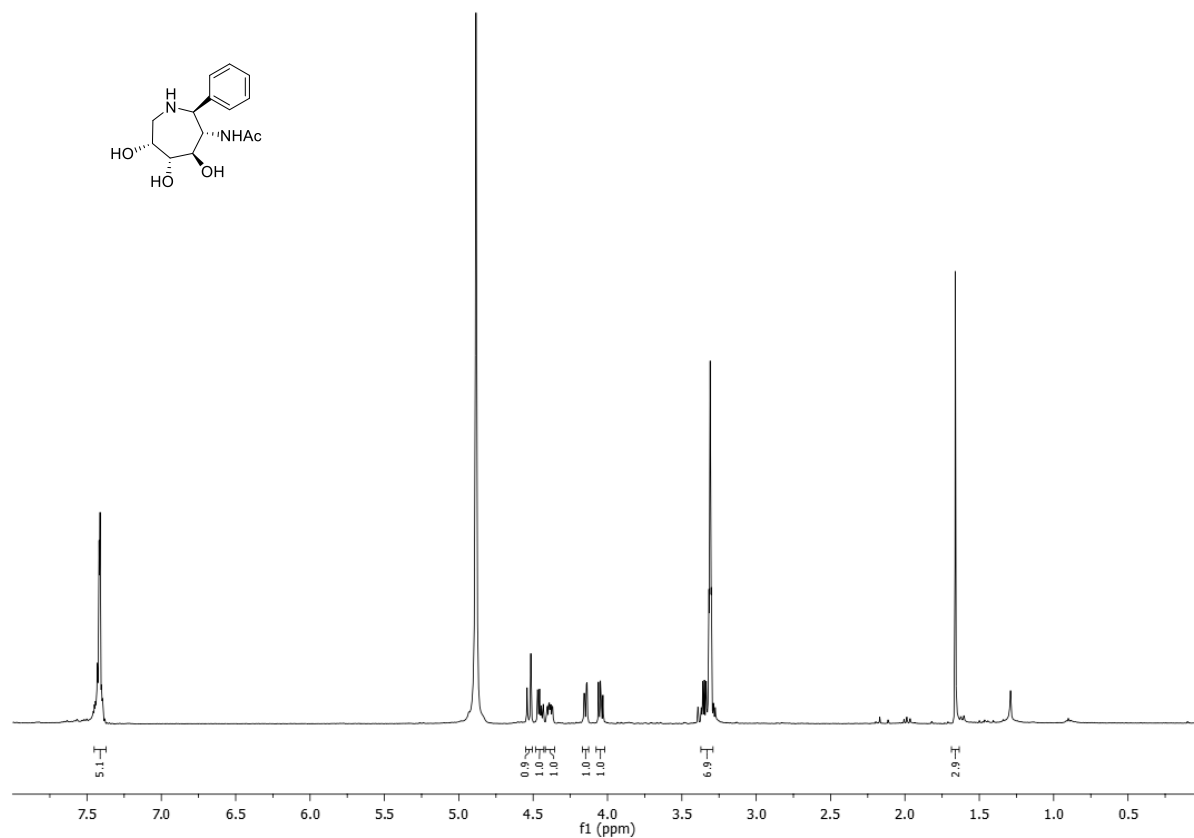

$^{13}\text{C}$  NMR spectrum of **31**, 100 MHz,  $\text{CD}_3\text{OD}$

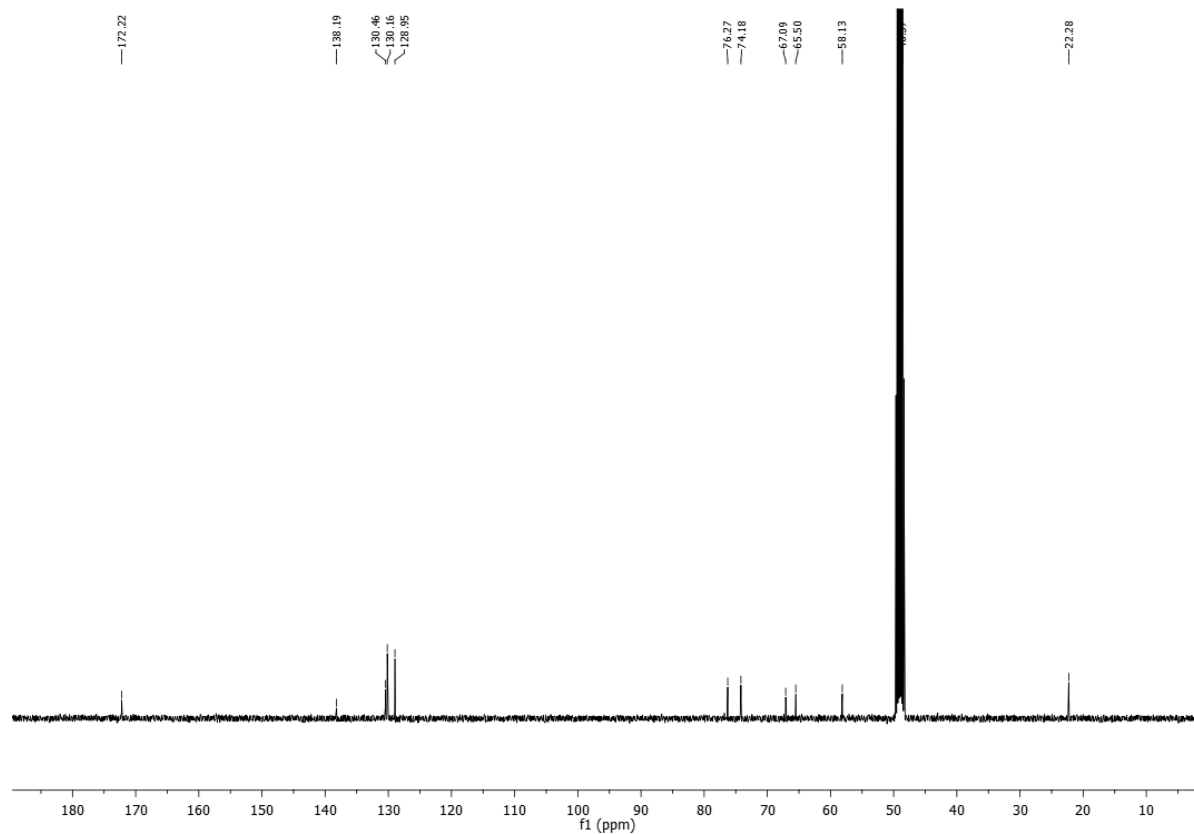

$^1\text{H}$  NMR spectrum of **32**, 400 MHz,  $\text{CD}_3\text{OD}$

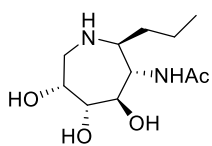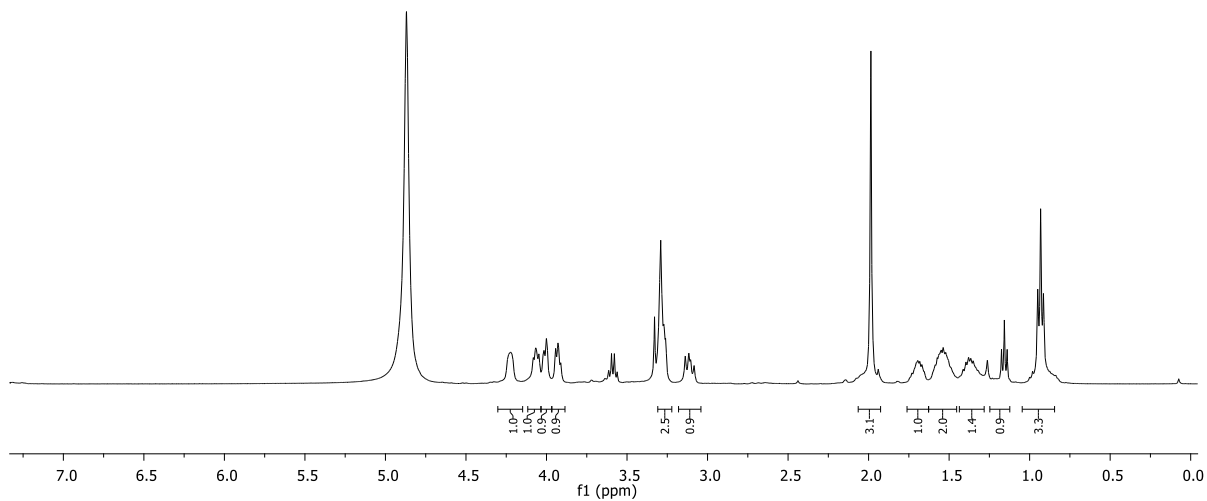

$^{13}\text{C}$  NMR spectrum of **32**, 100 MHz,  $\text{CD}_3\text{OD}$

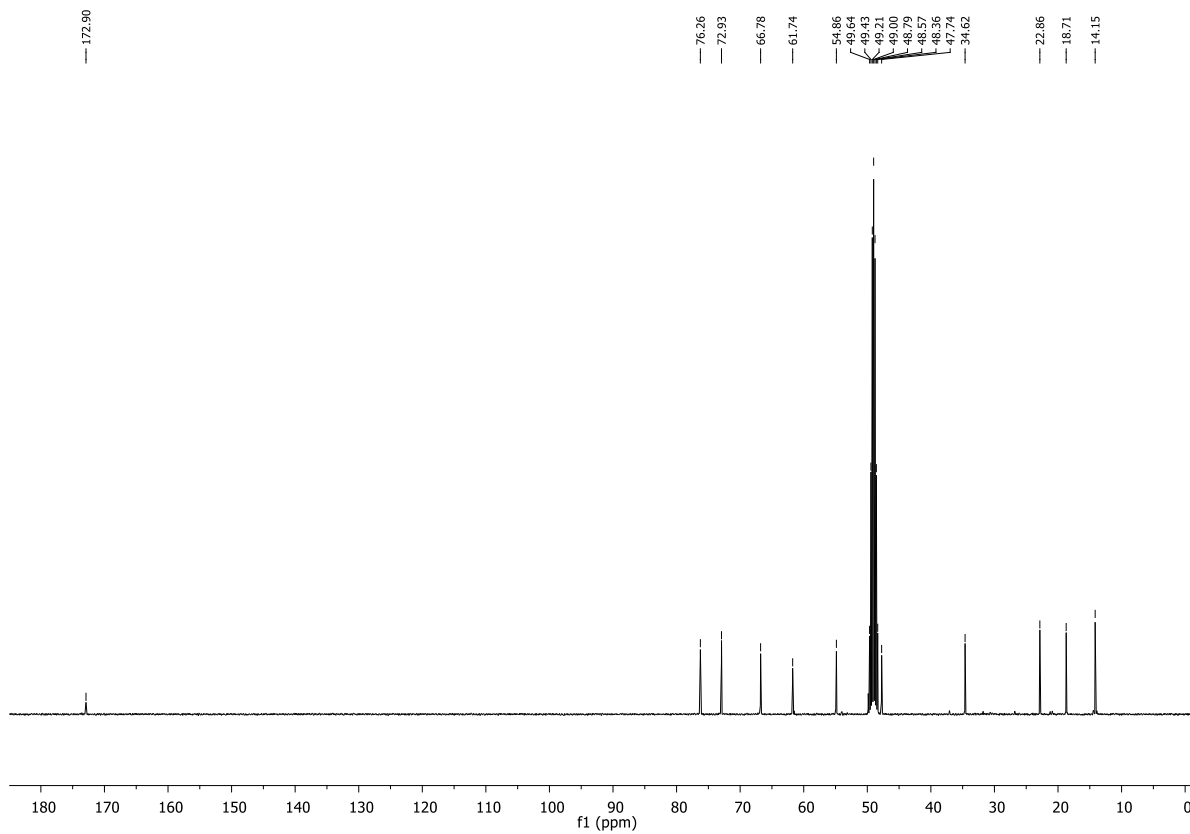

$^1\text{H}$  NMR spectrum of **33**, 400 MHz,  $\text{CD}_3\text{OD}$

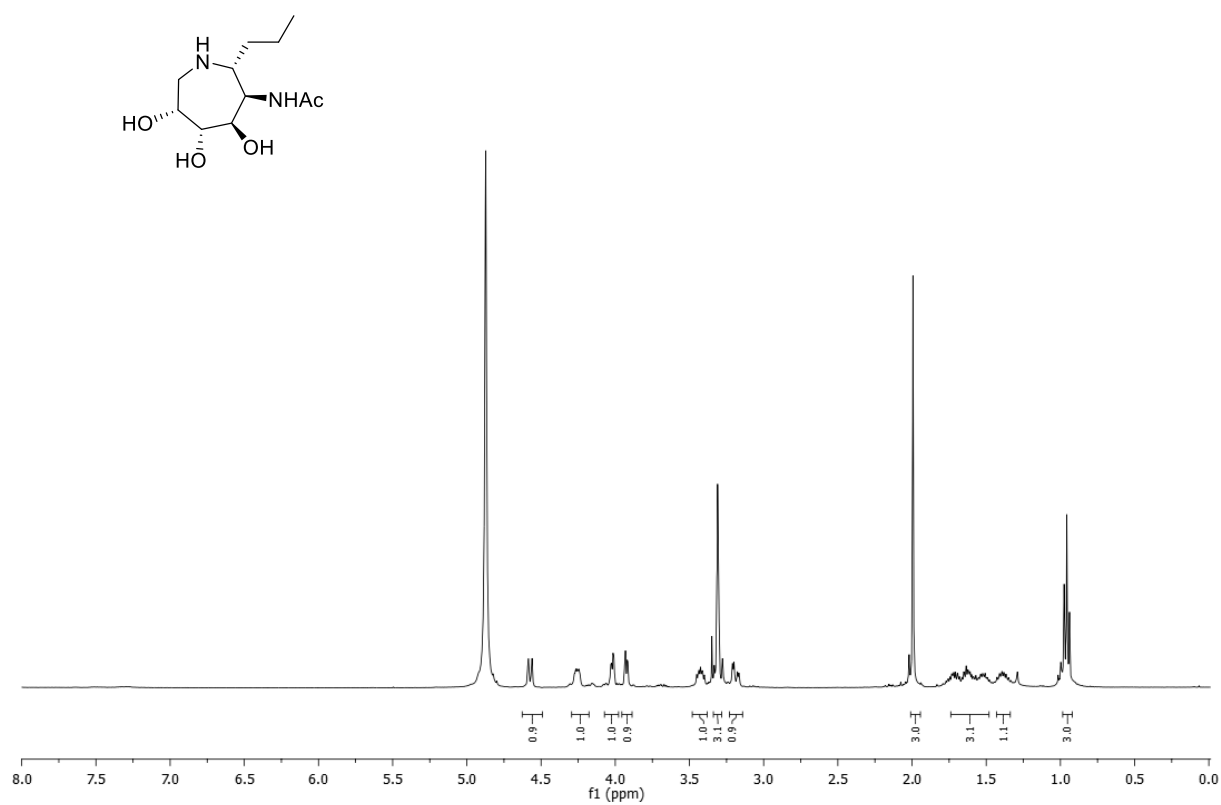

$^{13}\text{C}$  NMR spectrum of **33**, 100 MHz,  $\text{CD}_3\text{OD}$

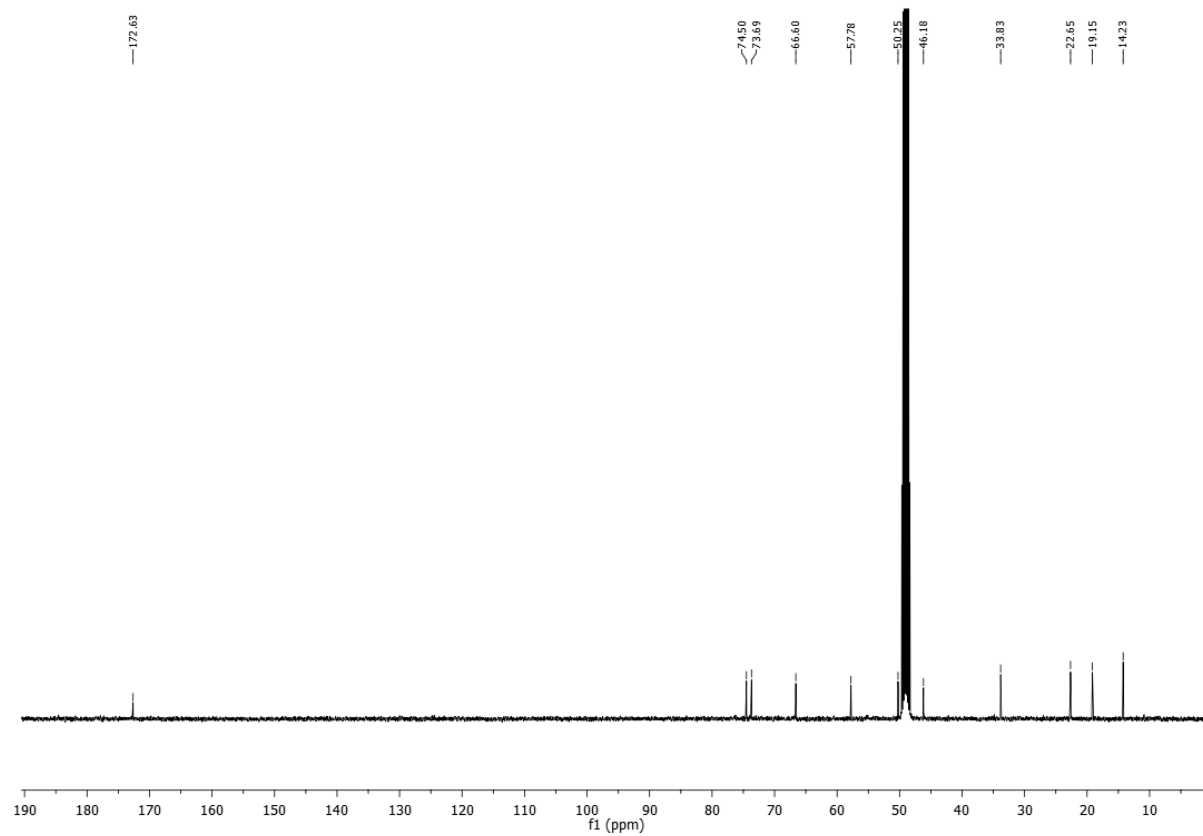

<sup>1</sup>H NMR spectrum of **35**, 400 MHz, CDCl<sub>3</sub>

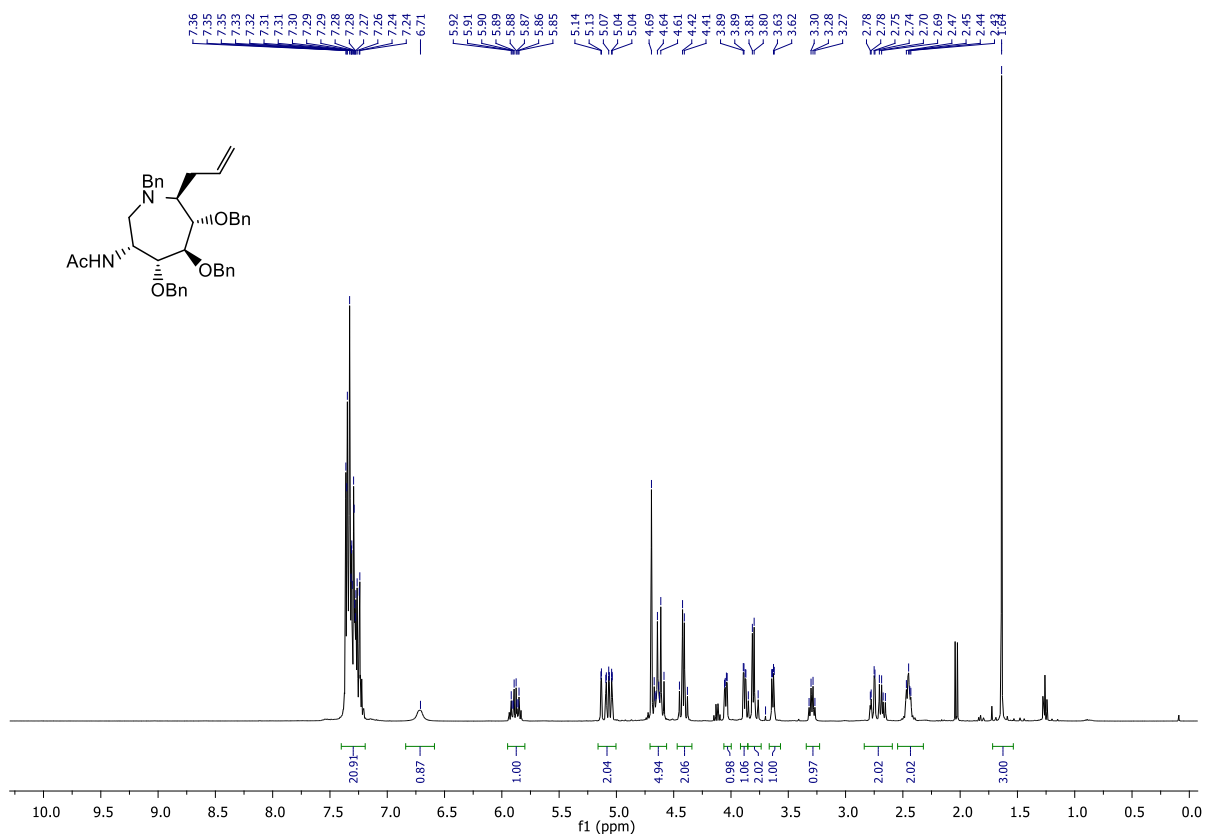

<sup>13</sup>C NMR spectrum of **35**, 100 MHz, CDCl<sub>3</sub>

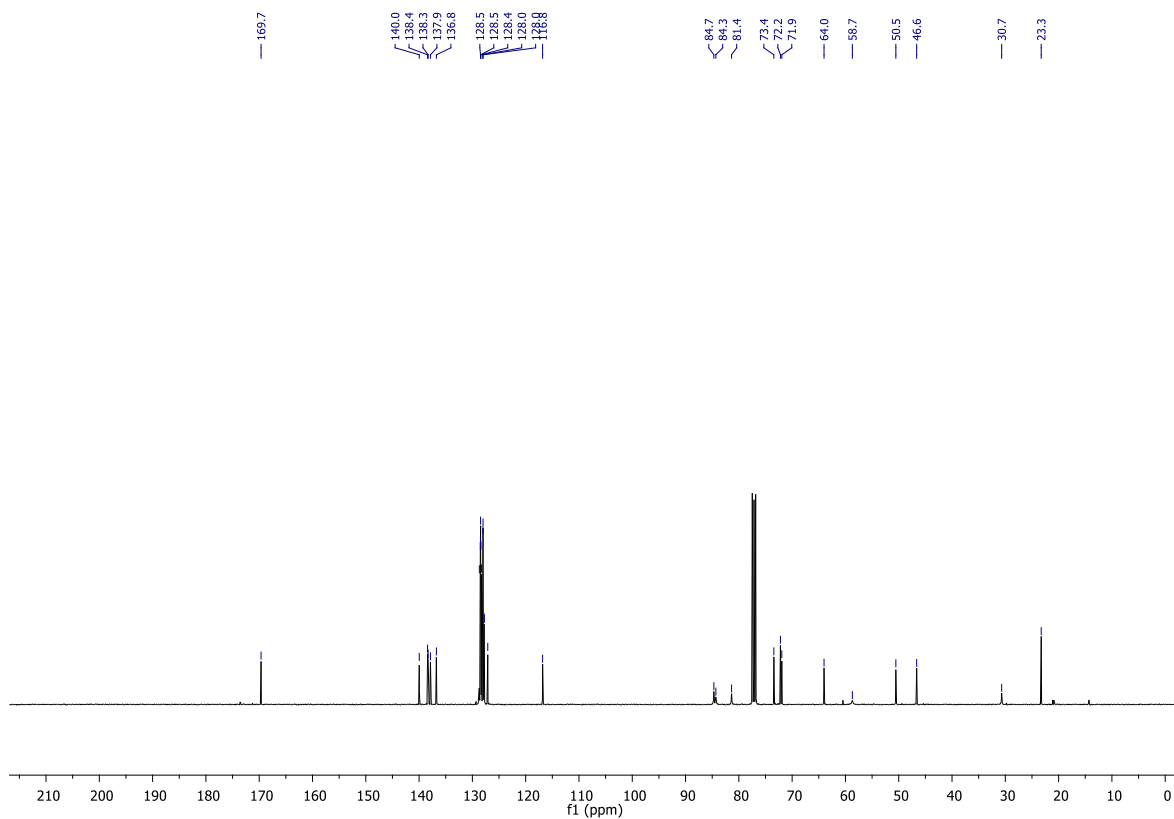



$^1\text{H}$  NMR spectrum of **36**, 400 MHz,  $\text{CD}_3\text{OD}$

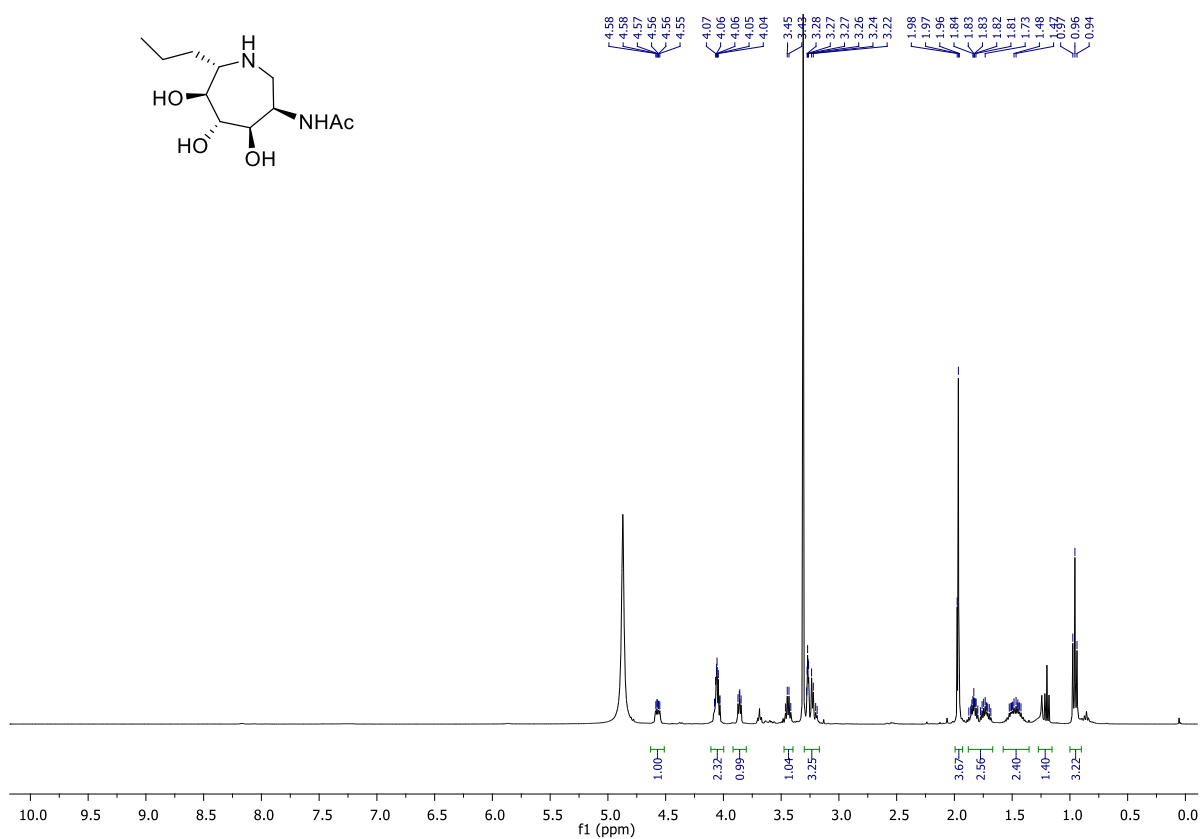

$^{13}\text{C}$  NMR spectrum of **36**, 100 MHz,  $\text{CD}_3\text{OD}$

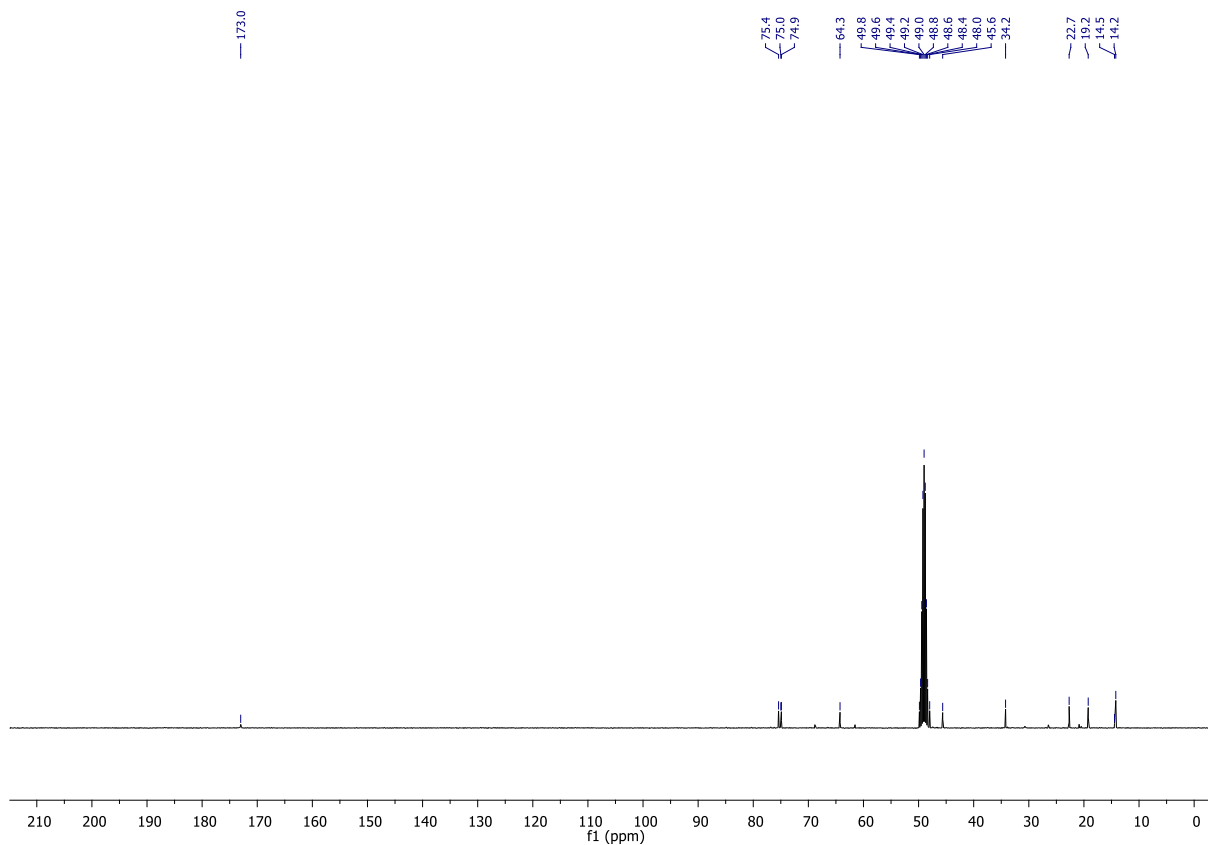

<sup>1</sup>H NMR spectrum of **38**, 400 MHz, CDCl<sub>3</sub>

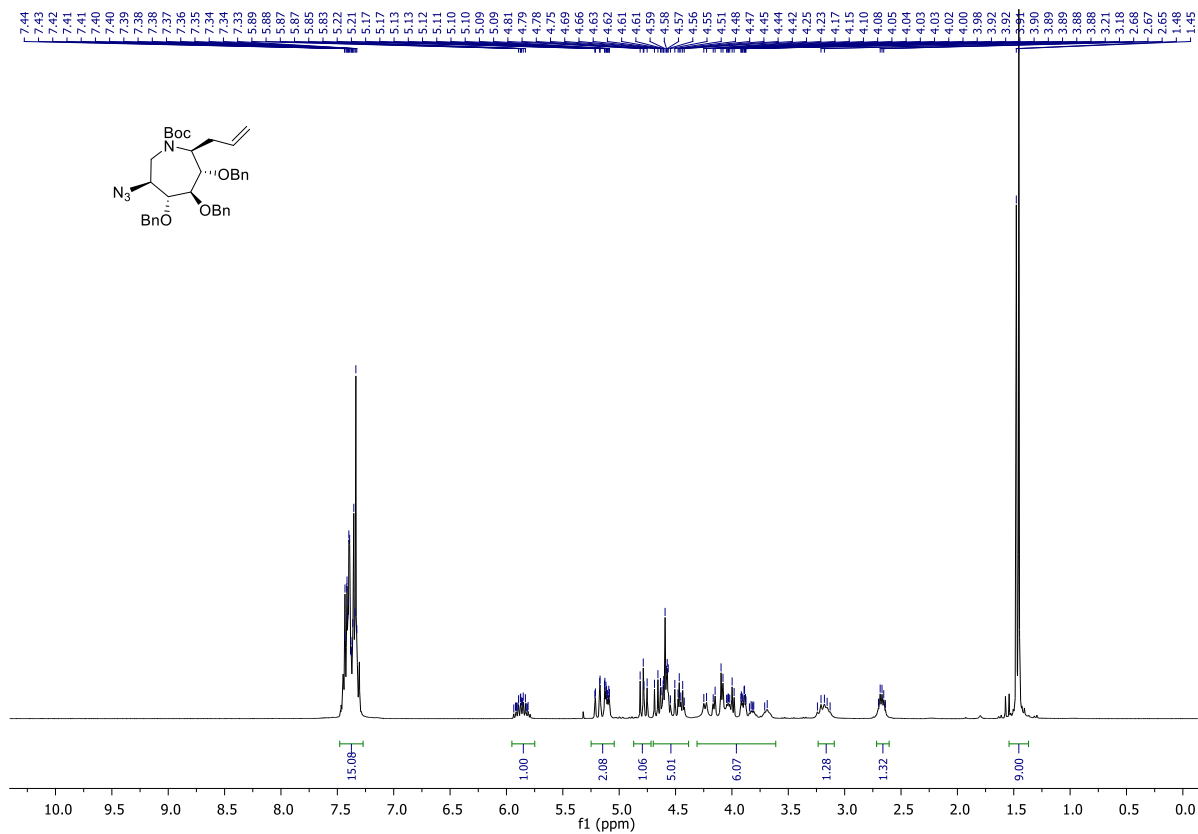

<sup>13</sup>C NMR spectrum of **38**, 100 MHz, CDCl<sub>3</sub>

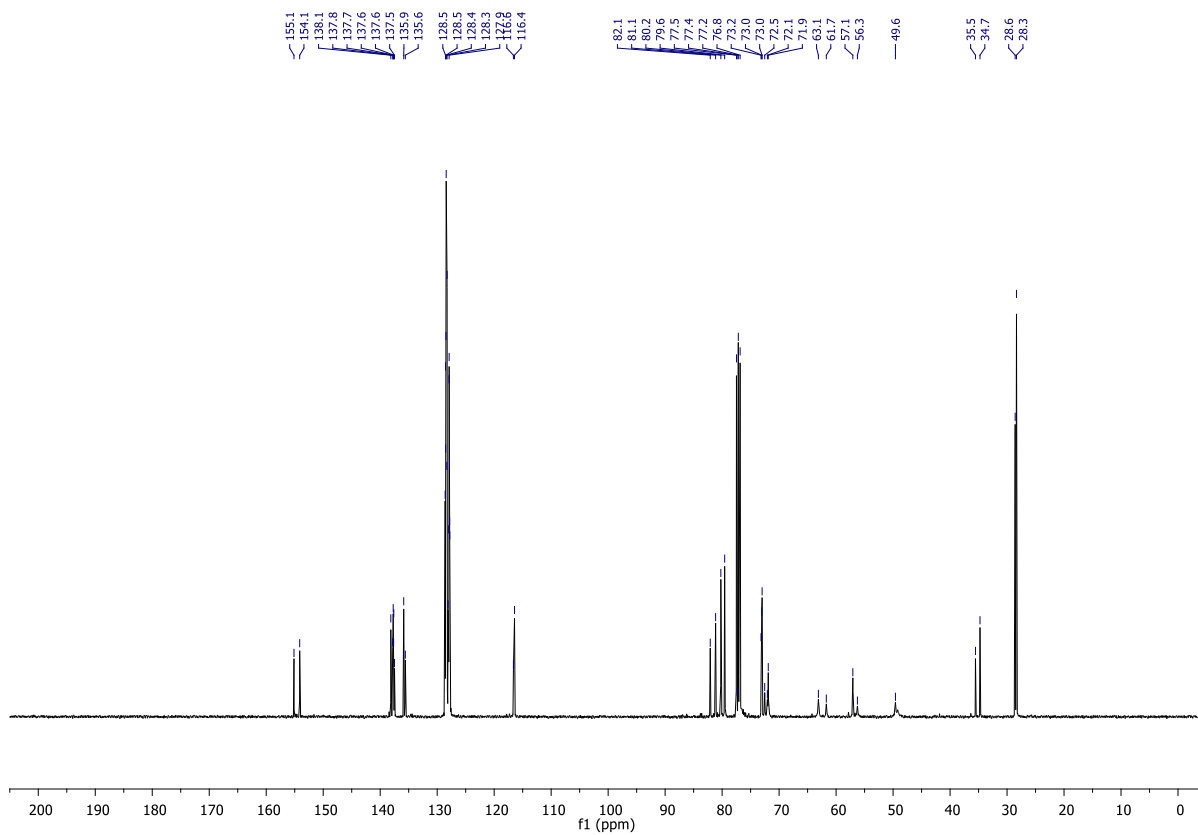

<sup>1</sup>H NMR spectrum of **39**, 400 MHz, CD<sub>3</sub>OD

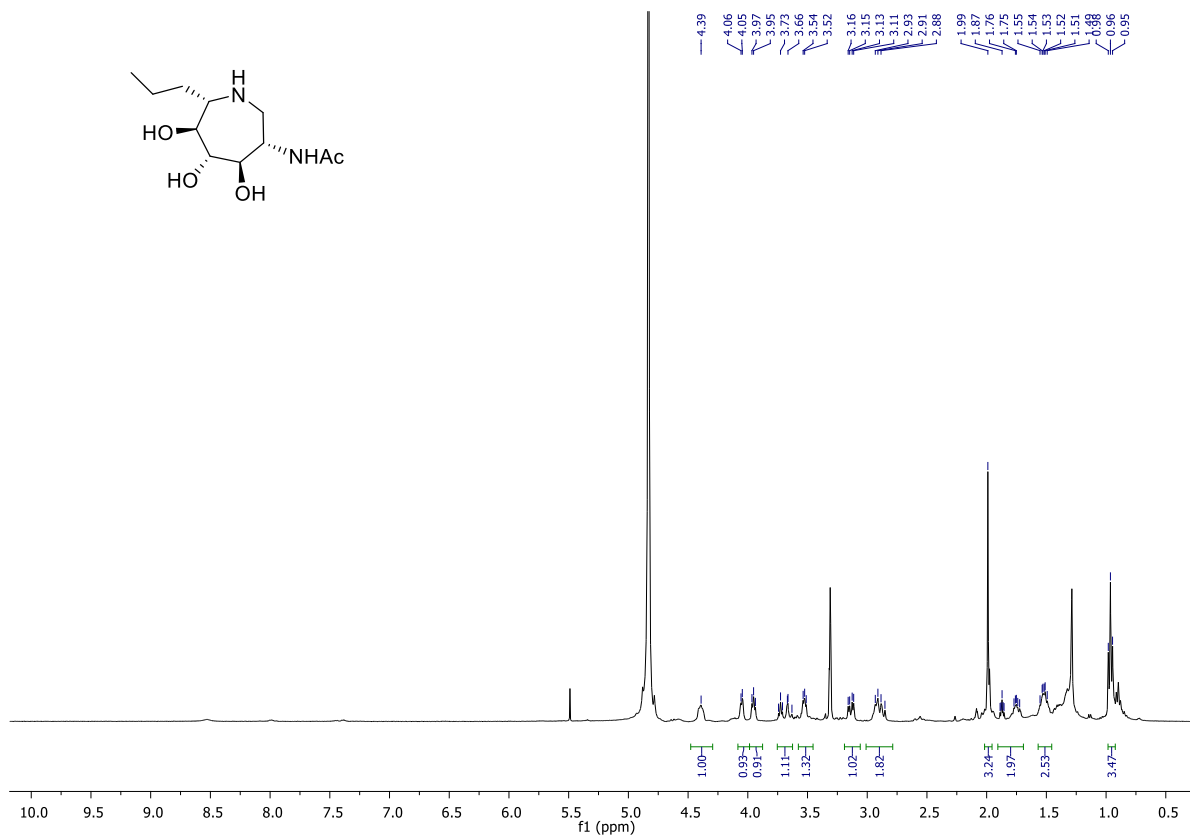

<sup>13</sup>C NMR spectrum of **39**, 100 MHz, CD<sub>3</sub>OD

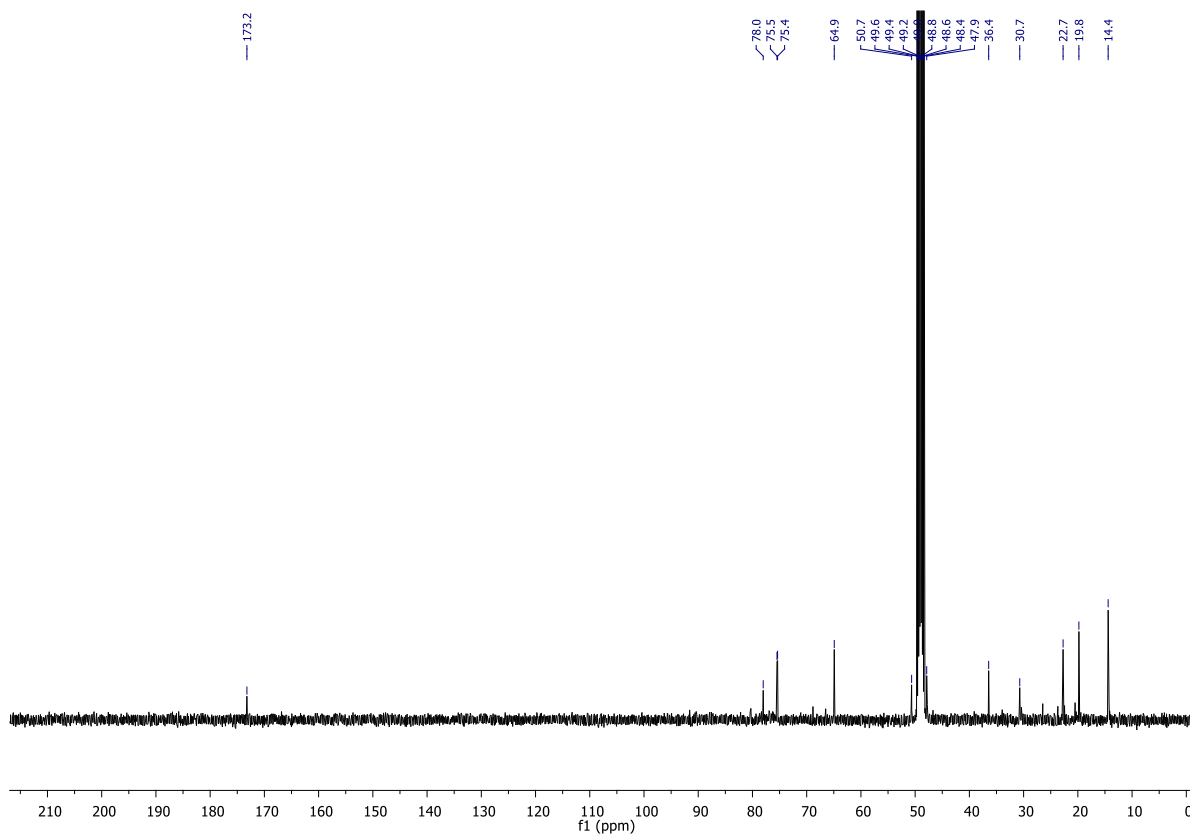

Supplement: d1ob02280f1.pdf [file d1ob02280f1.pdf]
